# Supplementary material for: Efficient Transformation of Catalpa bungei Shows Crystal Genes Conferring Resistance to the Shoot Borer Omphisa plagialis
Source: Frontiers journal article supplement (doi:10.3389/fpls.2021.777411), 2021-12-24
Supplement: Data_Sheet_1.pdf [file Data_Sheet_1.pdf]

Supplementary Table 1. Composition of medium tested for callus induction from mature *Catalpa bungei* seeds.

| Cotyledon<br>callusing<br>medium | Components      |               |              |               |                 |                |               |                  | Frequency<br>(%) | Significance* |
|----------------------------------|-----------------|---------------|--------------|---------------|-----------------|----------------|---------------|------------------|------------------|---------------|
|                                  | Basic<br>medium | TDZ<br>(mg/L) | ZT<br>(mg/L) | IAA<br>(mg/L) | 2,4-D<br>(mg/L) | 6-BA<br>(mg/L) | NAA<br>(mg/L) | Sucrose<br>(g/L) |                  |               |
| CCM1                             | MS              |               |              |               |                 |                |               | 30               | 0                | g             |
| CCM2                             | 1/2MS           | 0.30          |              | 0.30          |                 |                |               | 30               | 45.04 ±8.52      | f             |
| CCM3                             | 1/2MS           | 0.30          |              | 0.50          |                 |                |               | 30               | 53.57 ±7.25      | d             |
| CCM4                             | 1/2MS           | 0.30          |              | 0.70          |                 |                |               | 30               | 50.83 ±3.82      | e             |
| CCM5                             | 1/2MS           | 0.30          |              | 0.90          |                 |                |               | 30               | 44.05 ±7.79      | f             |
| CCM6                             | 1/2MS           | 0.30          |              | 0.50          | 0.05            |                |               | 30               | 58.33 ±6.29      | c             |
| CCM7                             | 1/2MS           | 0.30          |              | 0.70          | 0.05            |                |               | 30               | 70.99 ±7.03      | b             |
| CCM8                             | 1/2MS           | 0.30          |              | 0.90          | 0.05            |                |               | 30               | 63.45 ±6.40      | b             |
| CCM9                             | 1/2MS           |               | 0.30         | 0.30          |                 |                |               | 30               | 53.41 ±7.41      | d             |
| CCM10                            | 1/2MS           |               | 0.30         | 0.50          |                 |                |               | 30               | 72.11 ±4.42      | b             |
| CCM11                            | 1/2MS           |               | 0.30         | 0.70          |                 |                |               | 30               | 90.84 ±2.20      | a             |
| CCM12                            | 1/2MS           |               | 0.30         | 0.90          |                 |                |               | 30               | 65.03 ±9.69      | b             |
| CCM13                            | 1/2MS           |               | 0.20         | 0.50          |                 |                |               | 30               | 88.40 ±4.06      | a             |
| CCM14                            | 1/2MS           |               | 0.20         | 0.50          |                 |                |               | 60               | 57.00 ±7.55      | c             |
| CCM15                            | 1/2MS           |               | 0.20         | 0.50          |                 |                |               | 90               | 87.73 ±4.86      | a             |
| CCM16                            | MS              |               |              |               |                 | 0.50           | 0.20          | 30               | 96.41 ±1.84      | a             |
| CCM17                            | MS              |               |              |               |                 | 0.70           | 0.30          | 30               | 94.70 ±2.62      | a             |

MS, full-strength Murashige and Skoog basal medium; 1/2MS, half-strength MS; TDZ, Thidiazuron; ZT, Zeatin; IAA, Indole-3-acetic acid; 2,4-D, 2,4-Dichlorophenoxyacetic acid; 6-BA, 6-Benzylaminopurine; NAA, 1-Naphthylacetic acid.

The CCMs were gelled with 3 g/L gelrite, pH 5.8-6.0.

30 mature seeds of NJQ301 were inoculated for each type of CCMs, repeated three times.

\* Different lowercase letters (a, b, c, d, e, f, and g) indicate the statistical differences between CCMs ( $P < 0.05$ ).

Supplementary Table 2. Composition of medium tested for embryogenic callus induction of *Catalpa bungei*.

| Embryogenic<br>callusing medium | Components   |             |             |            |            | Frequency (%)     | Significance* |
|---------------------------------|--------------|-------------|-------------|------------|------------|-------------------|---------------|
|                                 | Basic medium | 6-BA (mg/L) | NAA (mg/L)  | IBA (mg/L) | IAA (mg/L) |                   |               |
| ECM1                            | MS           |             |             |            |            | 0                 | d             |
| ECM2                            | MS           | 0.30        | 0.10        |            |            | 2.22±0.92         | b             |
| ECM3                            | MS           | 0.60        | 0.10        |            |            | 3.50±0.19         | b             |
| ECM4                            | MS           | 0.60        | 0.15        |            |            | 3.58±0.22         | b             |
| ECM5                            | MS           | 0.75        | 0.15        |            |            | 3.54±0.19         | b             |
| ECM6                            | MS           | 0.60        | 0.20        |            |            | 3.58±0.21         | b             |
| ECM7                            | MS           | 1.00        | 0.20        |            |            | 1.11±0.92         | c             |
| ECM8                            | MS           | 2.00        | 0.30        |            |            | 0                 | d             |
| ECM9                            | MS           | 3.00        | 1.00        |            |            | 0                 | d             |
| ECM10                           | MS           | 4.00        | 1.50        |            |            | 0                 | d             |
| ECM11                           | MS           | 0.50        |             | 0.05       |            | 0                 | d             |
| ECM12                           | MS           | 1.00        |             | 0.05       | 0.10       | 1.11±0.93         | c             |
| ECM13                           | MS           | 0.10        |             | 0.50       |            | 0                 | d             |
| ECM14                           | MS           | 0.50        |             | 1.00       |            | 1.15±0.99         | c             |
| ECM15                           | MS           | 1.00        |             | 1.50       |            | 0                 | d             |
| <b>ECM16</b>                    | <b>DKW</b>   | <b>0.60</b> | <b>0.15</b> |            |            | <b>10.61±0.56</b> | <b>a</b>      |

MS, Murashige and Skoog basal medium; DKW, Driver and Kuniyuki walnut basal medium; 6-BA, 6-Benzylaminopurine; NAA, 1-Naphthylacetic acid; IBA, Indole-3-butyric acid; IAA, Indole-3-acetic acid.

The ECMs were added with 30g/L sucrose and gelled with 3 g/L gelrite, pH 5.8-6.0.

30 calli developed from mature seeds were inoculated for each type of ECMs, repeated three times.

\* Different lowercase letters (a, b, c, and d) indicate the statistical differences between ECMs ( $P < 0.05$ ).

Supplementary Table 3. Composition of medium tested for callus induction from stem segments of *Catalpa bungei*.

| Stem segment<br>callusing<br>medium | Components   |             |            |            | <i>C. bungei</i> half-sib<br>families | No. of stem segments<br>inoculated | No. of embryogenic<br>calli developed |
|-------------------------------------|--------------|-------------|------------|------------|---------------------------------------|------------------------------------|---------------------------------------|
|                                     | Basic medium | 6-BA (mg/L) | IBA (mg/L) | NAA (mg/L) |                                       |                                    |                                       |
| SCM1                                | MS           |             |            | 0.1        | NJQ303                                | 45                                 | 0                                     |
| SCM2                                | MS           |             | 0.1        |            | NJQ304                                | 45                                 | 0                                     |
| <b>SCM3</b>                         | <b>WPM</b>   |             |            | <b>0.1</b> | <b>NJQ305</b>                         | <b>45</b>                          | <b>1</b>                              |
| SCM4                                | WPM          |             | 0.1        |            | NJQ306                                | 45                                 | 0                                     |
| SCM5                                | DKW          |             |            | 0.1        | NJQ307                                | 45                                 | 0                                     |
| <b>SCM6</b>                         | <b>DKW</b>   |             |            | <b>0.2</b> | <b>NJQ308</b>                         | <b>45</b>                          | <b>1</b>                              |
| SCM7                                | DKW          |             |            | 0.4        | NJQ309                                | 45                                 | 0                                     |
| SCM8                                | DKW          |             | 0.1        |            | NJQ310                                | 45                                 | 0                                     |
| SCM9                                | DKW          |             | 0.2        |            | NJQ311                                | 45                                 | 0                                     |
| SCM10                               | DKW          |             | 0.4        |            | NJQ312                                | 45                                 | 0                                     |
| <b>SCM11</b>                        | <b>DKW</b>   | <b>0.1</b>  |            | <b>0.4</b> | <b>NJQ313</b>                         | <b>45</b>                          | <b>1</b>                              |

MS, Murashige and Skoog basal medium; WPM, woody plant basal medium; DKW, Driver and Kuniyuki walnut basal medium; 6-BA, 6-Benzylaminopurine; IBA, Indole-3-butytric acid; NAA, 1-Naphthylacetic acid.

The SCMs were added with 30g/L sucrose and gelled with 3 g/L gelrite, pH 5.8-6.0.

Supplementary Table 4. Callus induction frequency for NJQ305, NJQ308, and NJQ313 stem segments.

| <i>C. bungei</i> half-sib families | Stem segment callusing medium | Frequency (%) | Significance* | Embryogenic callusing medium | Frequency (%) | Significance* |
|------------------------------------|-------------------------------|---------------|---------------|------------------------------|---------------|---------------|
| NJQ305                             | SCM3                          | 97.22±2.55    | a             | SCM3                         | 39.89±3.19    | a             |
| NJQ308                             | SCM6                          | 83.06±3.37    | b             | SCM6                         | 29.51±1.90    | b             |
| NJQ313                             | SCM11                         | 93.16±3.60    | a             | SCM11                        | 36.99±2.38    | a             |

The SCMs were added with 30g/L sucrose and gelled with 3 g/L gelrite, pH 5.8-6.0.

45 stem segments of NJQ305, NJQ308 and NJQ313 were inoculated on SCM3, SCM6 and SCM11 respectively, repeated three times.

\* Different lowercase letters (a and b) indicate the statistical differences between NJQ305, NJQ308, and NJQ313 ( $P < 0.05$ ).

Supplementary Table 5. Composition of medium tested for differentiation and regeneration from embryogenic calli of *Catalpa bungei*.

| Differentiating medium | Components   |             |             |           |             | Frequency (%)   |
|------------------------|--------------|-------------|-------------|-----------|-------------|-----------------|
|                        | Basic medium | 6-BA (mg/L) | NAA (mg/L)  | KT (mg/L) | ZT (mg/L)   |                 |
| DM1                    | MS           |             |             |           |             | 0               |
| DM2                    | MS           | 0.50        |             | 0.20      |             | 0               |
| DM3                    | MS           | 1.00        |             | 0.20      |             | 0               |
| DM4                    | MS           |             | 0.05        | 0.50      | 0.10        | 0               |
| DM5                    | MS           | 0.60        | 0.15        |           | 0.10        | 0               |
| DM6                    | MS           | 0.60        | 0.20        |           | 0.10        | 0               |
| DM7                    | MS           | 0.60        | 0.40        |           | 0.10        | 0               |
| DM8                    | MS           | 0.60        | 0.15        |           | 0.05        | 0               |
| DM9                    | MS           | 0.60        | 0.15        |           | 0.15        | 0               |
| DM10                   | MS           | 0.60        | 0.15        |           | 0.20        | 0               |
| <b>DM11</b>            | <b>DKW</b>   | <b>0.60</b> | <b>0.15</b> |           | <b>0.20</b> | <b>100±0.00</b> |

MS, Murashige and Skoog basal medium; DKW, Driver and Kuniyuki walnut basal medium; 6-BA, 6-Benzylaminopurine; NAA, 1-Naphthylacetic acid; KT, kinetin; ZT, zeatin.

The DMs were added with 30g/L sucrose and gelled with 3 g/L gelrite, pH 5.8-6.0.

30 embryogenic calli clumps were inoculated for each type of DMs, and repeated three times.

Supplementary Table 6. Composition of medium tested for shoot cutting rooting of *Catalpa bungei*.

| Rooting medium | Components   |             |             | Rooting frequency (%) | Significance* |
|----------------|--------------|-------------|-------------|-----------------------|---------------|
|                | Basic medium | IBA(mg/L)   | NAA(mg/L)   |                       |               |
| RM1            | 1/2MS        |             |             | 0                     | f             |
| RM2            | 1/2MS        | 0.01        |             | 78.89±5.09            | b             |
| RM3            | 1/2MS        | 0.05        |             | 83.33±5.77            | a             |
| RM4            | 1/2MS        | 0.10        |             | 86.67±6.67            | a             |
| RM5            | 1/2MS        |             | 0.01        | 41.11±6.94            | e             |
| RM6            | 1/2MS        |             | 0.05        | 55.56±3.85            | d             |
| RM7            | 1/2MS        |             | 0.10        | 75.56±6.94            | c             |
| RM8            | 1/2MS        | 0.10        | 0.10        | 87.66±3.75            | a             |
| <b>RM9</b>     | <b>DKW</b>   | <b>0.10</b> | <b>0.10</b> | <b>90.88±4.05</b>     | <b>a</b>      |

1/2MS, half-strength MS; DKW, Driver and Kuniyuki walnut basal medium; IBA, Indole-3-butytric acid; NAA, 1-Naphthylacetic acid.

The RMs were added with 20g/L sucrose and gelled with 3 g/L gelrite, pH 5.8-6.0.

30 shoots were inoculated for each type of RMs, repeated three times.

\* Different lowercase letters (a, b, c, d, e and f) indicate the statistical differences between RMs ( $P < 0.05$ ).



Supplementary Table 7. Effect of *Agrobacterium* concentration.

| Effect factors              |                                                               |                    |                     | Transformation frequency (%) | Significance* |
|-----------------------------|---------------------------------------------------------------|--------------------|---------------------|------------------------------|---------------|
| <i>Agrobacterium</i> strain | OD <sub>600</sub> value of <i>Agrobacterium</i> resuspensions | Infection duration | Co-cultivation time |                              |               |
| EHA105                      | 0.2                                                           | 20 min             | 48 h                | 27.53 ±5.19                  | d             |
| EHA105                      | 0.4                                                           | 20 min             | 48 h                | 80.25 ±5.35                  | a             |
| EHA105                      | 0.5                                                           | 20 min             | 48 h                | 92.03 ±2.06                  | b             |
| EHA105                      | 0.6                                                           | 20 min             | 48 h                | 97.65 ±2.04                  | a             |
| EHA105                      | 0.8                                                           | 20 min             | 48 h                | 37.13 ±4.04                  | c             |
| EHA105                      | 1.0                                                           | 20 min             | 48 h                | 17.93 ±3.58                  | e             |

DM11 was the best-selected medium for shoot regeneration, which is listed in Supplementary Table 5.

30 transformed embryogenic callus clumps were inoculated on DM11 containing 150mg/L kanamycin for each experiment, and repeated three times.

\* Different lowercase letters (a, b, c, d, and e) indicate the statistical differences between different bacterial concentrations ( $P < 0.05$ ).

Supplementary Table 8. Effect of co-cultivation time.

| <i>Agrobacterium</i> strain | Effect factors                                                |                    |                     | Transformation frequency (%) | Significance* |
|-----------------------------|---------------------------------------------------------------|--------------------|---------------------|------------------------------|---------------|
|                             | OD <sub>600</sub> value of <i>Agrobacterium</i> resuspensions | Infection duration | Co-cultivation time |                              |               |
| EHA105                      | 0.6                                                           | 20 min             | <b>24 h</b>         | 91.86±1.95                   | a             |
| EHA105                      | 0.6                                                           | 20 min             | <b>48 h</b>         | 95.52±1.89                   | a             |
| EHA105                      | 0.6                                                           | 20 min             | <b>72 h</b>         | 57.65±2.72                   | b             |

DM11 was the best-selected medium for shoot regeneration, which is listed in Supplementary Table S5.

30 transformed embryogenic callus clumps were inoculated on DM11 containing 150mg/L kanamycin for each experiment, and repeated three times.

\* Different lowercase letters (a, and b) indicate the statistical differences between different co-cultivation times ( $P < 0.05$ ).

Supplementary Table 9. Effect of *Agrobacterium* strains and infection duration.

| <i>Agrobacterium</i> strain | Effect factors                                                |                    |                     | Transformation frequency (%) | Significance* |
|-----------------------------|---------------------------------------------------------------|--------------------|---------------------|------------------------------|---------------|
|                             | OD <sub>600</sub> value of <i>Agrobacterium</i> resuspensions | Infection duration | Co-cultivation time |                              |               |
| <b>EHA105</b>               | 0.6                                                           | <b>10 min</b>      | 48 h                | 70.54 ± 6.47                 | c             |
| <b>EHA105</b>               | 0.6                                                           | <b>20 min</b>      | 48 h                | 95.39 ± 1.79                 | a             |
| <b>EHA105</b>               | 0.6                                                           | <b>30 min</b>      | 48 h                | 77.16 ± 4.10                 | bc            |
| <b>GV3101</b>               | 0.6                                                           | <b>10 min</b>      | 48 h                | 27.78 ± 5.09                 | d             |
| <b>GV3101</b>               | 0.6                                                           | <b>20 min</b>      | 48 h                | 71.60 ± 5.66                 | c             |
| <b>GV3101</b>               | 0.6                                                           | <b>30 min</b>      | 48 h                | 83.80 ± 3.33                 | b             |

DM11 was the best-selected medium for shoot regeneration, which is listed in Supplementary Table 5.

30 transformed embryogenic calli clumps were inoculated on DM11 containing 150mg/L kanamycin for each experiment, and repeated three times.

\* Different lowercase letters (a, b, c, and d) indicate the statistical differences between different combinations of *Agrobacterium* strain and infection duration ( $P < 0.05$ ).

Supplementary Table 10. Transformation efficiency of *Catalpa bungei*.

| Replicates | No. of detected plants | No. of GUS positive plants | Positive frequency (%) | Average positive frequency (%) |
|------------|------------------------|----------------------------|------------------------|--------------------------------|
| 1          | 103                    | 95                         | 92.23                  | 92.31 ±4.92                    |
| 2          | 35                     | 34                         | 97.14                  |                                |
| 3          | 26                     | 22                         | 84.62                  |                                |
| 4          | 25                     | 24                         | 96.00                  |                                |
| 5          | 95                     | 87                         | 91.58                  |                                |

Supplementary Table 11. The summary of sequence data from next generation sequencing.

| <b>Samples</b> | <b>Clean reads</b> | <b>Clean bases (Gb)</b> | <b>Depth (×)</b> | <b>GC (%)</b> | <b>Q20 (%)</b> | <b>Q30 (%)</b> |
|----------------|--------------------|-------------------------|------------------|---------------|----------------|----------------|
| WT             | 151,906,680        | 22,684,883,644          | 29.72            | 36.27         | 97.58          | 92.39          |
| #2             | 149,360,140        | 22,325,631,422          | 29.24            | 39.29         | 97.69          | 92.84          |
| #3             | 130,147,192        | 19,453,884,878          | 25.48            | 40.51         | 97.39          | 91.83          |
| #7             | 160,671,490        | 24,004,434,282          | 31.44            | 36.47         | 97.85          | 93.20          |

Supplementary Table 12. The junction reads obtained by next generation sequencing in the genome of transgenic and wild-type *C.bunnei*.

| <b>Plant</b> | <b>Position (s) in the reference genome</b> | <b>gDNA flanking the insert</b> | <b>Inserted T-DNA: position (s) in T-DNA vector</b>             | <b>Estimated insert size (bp)</b> |
|--------------|---------------------------------------------|---------------------------------|-----------------------------------------------------------------|-----------------------------------|
| WT           | --                                          | --                              | --                                                              | --                                |
| #2           | Group 4: 25,512,704                         | Left side                       | LB: 1,339-1,395                                                 | At least 1,395                    |
| #3           | Group 1: 2,451,212                          | Right side                      | RB-CaMV poly (A) signal: 4875-5049                              | At least 175                      |
| #3           | Group 6: 25,511,359<br>Group 0: 1,663,775   | Left side                       | LB-Lac operator (1,204-1,220)+ Lac promoter (1,228-1,258)       | At least 1,258                    |
| #7           | Group 3: 21,586,673                         | Left side                       | LB- Lac promoter (1,228-1,258) + CAP binding site (1,273-1,294) | At least 1,294                    |
| #7           | Group 5: 32,706,411                         | Left side                       | LB: 1,354-1,395                                                 | At least 1,395                    |

-- means that no junction read was detected in the wild-type genome.
